# Supplementary material for: Pathogenicity and Relative Abundance of Dickeya and Pectobacterium Species in Switzerland: An Epidemiological Dichotomy
Source: MDPI journal article supplement (doi:10.3390/microorganisms9112270), 2021-10-31
Supplement: s1 [file s1]

# Supplementary Material

**Table S1.** Meteorological data for a representative field in the center of the seed potato growing area (Düdingen, FR, Switzerland) from 2010 to 2021.

| year | average monthly temperature (°C) |      |      |      |         |
|------|----------------------------------|------|------|------|---------|
|      | April                            | Mai  | Juni | July | average |
| 2010 | 9.3                              | 11.4 | 15.9 | 19.8 | 14.1    |
| 2011 | 11.2                             | 14.3 | 15.9 | 16.2 | 14.4    |
| 2012 | 7.7                              | 13.1 | 16.8 | 17.5 | 13.8    |
| 2013 | 7.9                              | 9.5  | 15.0 | 19.6 | 13.0    |
| 2014 | 10.0                             | 11.5 | 17.2 | 17.0 | 13.9    |
| 2015 | 9.2                              | 13.5 | 17.8 | 22.0 | 15.6    |
| 2016 | 7.9                              | 11.8 | 15.9 | 19.1 | 13.7    |
| 2017 | 8.0                              | 13.3 | 18.8 | 19.0 | 14.8    |
| 2018 | 11.6                             | 14.0 | 17.6 | 20.0 | 15.8    |
| 2019 | 7.8                              | 9.9  | 18.3 | 20.3 | 14.1    |
| 2020 | 11.1                             | 13.1 | 15.6 | 19.4 | 14.8    |
| 2021 | 6.9                              | 10.0 | 17.8 | 17.7 | 13.1    |

  

| year | monthly precipitation (mm) |     |      |      |       |
|------|----------------------------|-----|------|------|-------|
|      | April                      | Mai | Juni | July | total |
| 2010 | 31                         | 114 | 83   | 61   | 289   |
| 2011 | 17                         | 81  | 139  | 113  | 350   |
| 2012 | 112                        | 29  | 117  | 121  | 379   |
| 2013 | 114                        | 69  | 59   | 122  | 364   |
| 2014 | 106                        | 153 | 84   | 221  | 564   |
| 2015 | 83                         | 146 | 70   | 23   | 323   |
| 2016 | 160                        | 135 | 198  | 167  | 660   |
| 2017 | 64                         | 108 | 80   | 92   | 344   |
| 2018 | 27                         | 53  | 110  | 58   | 247   |
| 2019 | 58                         | 106 | 73   | 48   | 286   |
| 2020 | 30                         | 73  | 141  | 9    | 254   |
| 2021 | 19                         | 147 | 219  | 250  | 635   |
